# Supplementary material for: Activating graphite with defects and oxygenic functional groups to boost sodium-ion storage
Source: Royal Society of Chemistry journal article supplement (doi:10.1039/d3nr03019a), 2023-01-01
Supplement: d3nr03019a1.pdf [file d3nr03019a1.pdf]

## Supporting Information

### **Activating graphite with defects and oxygenic functional groups to boost sodium-ion storage**

Juanxia Ding,<sup>a,b</sup> Xiaozhong Zhou,<sup>\*a</sup> Jian Gao<sup>\*, b</sup> and Ziqiang Lei<sup>a</sup>

<sup>a</sup> Key Laboratory of Eco-functional Polymer Materials of the Ministry of Education, Key laboratory of Eco-environmental Polymer Materials of Gansu Province, College of Chemistry and Chemical Engineering, Northwest Normal University, 967 Anning East Road, Lanzhou, 730070, China

\*Corresponding author: Xiaozhong Zhou, E-mail: zxz20004@163.com;

<sup>b</sup> New Energy Materials Laboratory, Sichuan Changhong Electronic (Group) Co.Ltd., Chengdu, 610041, China.

\*Corresponding author: Jian Gao, E-mail: gaojian@changhong.com

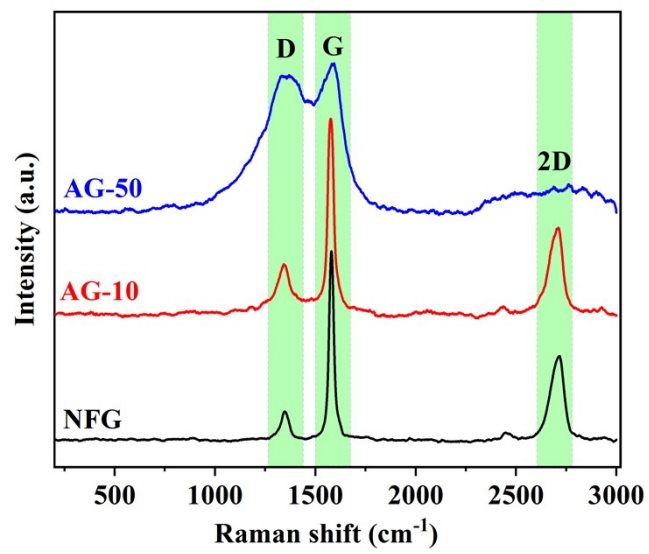

Figure S1. Raman spectra of NFG, AG-10 and AG-50.

**Table S1.** Deconvoluted band assignments of Raman spectra.

| Code           | Corresponding structure                                                                            | Symmetry        | Raman Shift (cm <sup>-1</sup> ) | Line Shape |
|----------------|----------------------------------------------------------------------------------------------------|-----------------|---------------------------------|------------|
| D <sub>4</sub> | <i>sp</i> <sup>2</sup> - <i>sp</i> <sup>3</sup> hybrid structures or C–C/C=C stretching vibrations | A <sub>1g</sub> | ~1200                           | Gaussian   |
| D              | Disorder in graphite lattice                                                                       | A <sub>1g</sub> | ~1350                           | Gaussian   |
| D <sub>3</sub> | Amorphous structure                                                                                | --              | ~1500                           | Gaussian   |
| G              | Graphite lattice                                                                                   | E <sub>2g</sub> | ~1585                           | Gaussian   |
| D <sub>2</sub> | Few-layer graphene                                                                                 | E <sub>2g</sub> | ~1620                           | Gaussian   |

**Table S2.** Calculated integral areas and relative ratios of fitted subpeaks from Raman spectra for NFG, AG-10 and AG-50.

| Substances | D <sub>4</sub> (%) | D (%) | D <sub>3</sub> (%) | G (%) | D <sub>2</sub> (%) | I <sub>D</sub> /I <sub>G</sub> | I <sub>D4</sub> /I <sub>G</sub> |
|------------|--------------------|-------|--------------------|-------|--------------------|--------------------------------|---------------------------------|
| NFG        | --                 | 26.45 | --                 | 73.55 | --                 | 0.35                           | --                              |
| AG-10      | 9.74               | 24.80 | 12.26              | 37.01 | 16.19              | 0.67                           | 0.26                            |
| AG-50      | 22.40              | 38.00 | 14.43              | 17.74 | 7.43               | 2.14                           | 1.26                            |

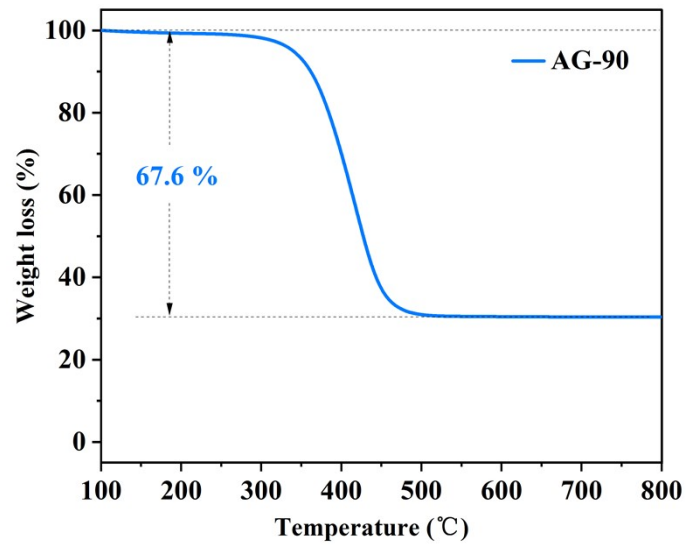

**Figure S2.** TG curves of sample with ball-milling time of 90 hours (marked as AG-90).

**Table S3.** Comparisons of electrochemical performance of carbon-based anodes for SIBs.

| Materials                                | Voltage range (V) | Current density / ICE / Reversible capacity / Cycle number / Retention rate ( A g <sup>-1</sup> / % / mAh g <sup>-1</sup> / cycles / % ) | Electrolyte system                                  | Ref. |
|------------------------------------------|-------------------|------------------------------------------------------------------------------------------------------------------------------------------|-----------------------------------------------------|------|
| Commercial hard carbon                   | 0-2.0             | 0.025 / 78 / 220 / 100 / 91.7                                                                                                            | 1M NaClO <sub>4</sub> in 1:1 (v/v) EC: DEC          | 1    |
| N-doped interconnected carbon nanofibers | 0.01-2.0          | 0.05 / 41.8 / 134.2 / 200 / 88.7                                                                                                         | 1M NaPF <sub>6</sub> in 1:1 (w/w) EC: DEC           | 2    |
| N-doped carbon nanosheets                | 0-3.0             | 0.05 / 34.9 / 155.2 / 260 / 44.4                                                                                                         | 1M NaPF <sub>6</sub> in 1:1 (w/w) EC: DMC           | 3    |
| nanoporous hard carbon                   | 0.01-2.0          | 0.02 / 77 / 289 / 100 / 89.2                                                                                                             | 1M NaClO <sub>4</sub> in 1:1 (v/v) EC: DEC          | 4    |
| 3D Amorphous Carbon                      | 0-3.0             | 0.03 / 75 / 280.1 / - / - / -                                                                                                            | 1M NaPF <sub>6</sub> in 1:1 (v/v) EC: DMC           | 5    |
| P-doped carbon nanosheets                | 0.01-3.0          | 0.1 / 46.7 / 328 / 100 / 97.7<br>5 / - / - / 149 / 5000 / -                                                                              | 1M NaClO <sub>4</sub> in PC+5% FEC                  | 6    |
| Rape seed shuck derived hard carbon      | 0.01-3.0          | 0.1 / 80 / 143 / 200 / 72                                                                                                                | 1M NaClO <sub>4</sub> in 1:1 (v/v) EC: DEC +5% FEC  | 7    |
| C1600-M                                  | 0.02-3.0          | 0.03 / 47.7 / 368 / - / -<br>1.5 / - / 141 / 2000 / 80.2                                                                                 | 1M NaClO <sub>4</sub> in 1:1 (v/v) EC: PC +5% FEC   | 8    |
| S-doped N-rich carbon nanosheets         | 0.01-3.0          | 0.5 / 43.9 / 350 / 200 / 83.5<br>1 / - / 211 / 1000 / 87.9                                                                               | 1M NaClO <sub>4</sub> in 1:1 (v/v) EC: PC           | 9    |
| S/N-codoped hollow carbon spheres        | 0.01-3.0          | 0.1 / 27.8 / 250 / - / -<br>0.5 / - / 169 / 2000 / 75                                                                                    | 1M NaClO <sub>4</sub> in 1:1 (v/v) EC: DEC + 2% FEC | 10   |
| BPPG-1000-A                              | 0.001-2.8         | 0.05 / 73 / - / - / -<br>0.1 / - / 298 / 290 / ~88                                                                                       | 1M NaClO <sub>4</sub> in 1:1 (v/v) EC: DEC          | 11   |
| CNPs                                     | 0.005-3.0         | 0.1 / 49 / 278 / 200 / -                                                                                                                 | 1M NaClO <sub>4</sub> in 1:1(v/v) EC:PC + 0.3% FEC  | 12   |

|           |           |                                                                     |                                                           |                  |
|-----------|-----------|---------------------------------------------------------------------|-----------------------------------------------------------|------------------|
| SHC-1300  | 0.01-2.5  | 0.05 / 30.6 / 355.6 / 3 / 87.7<br>5 / - / 104 / 1000 / ~50          | 1M NaClO <sub>4</sub> in 1:1 (v/v) EC: DMC                | 13               |
| LS1200    | 0.01-2.5  | 0.05 / 50.4 / 295 / 200 / 90                                        | 1M NaClO <sub>4</sub> in (v/v) PC + 2% FEC                | 14               |
| C-1300    | 0.005-2.5 | 0.05 / 68 / 297 / 100 ~95<br>2.5 / - / 116 / 500 / ~90              | 1M NaClO <sub>4</sub> in (v/v) EC :PC:DMC(9:9:2)          | 15               |
| CPP       | 0.01-3    | 0.1 / 59.8 / 221.5 / - / -<br>0.2 / - / 203.3 / 200 / 98            | 1M NaClO <sub>4</sub> in 1:1 (v/v) EC: PC +5% FEC         | 16               |
| p-HNCs    | 0.01-3.0  | 0.1 / 51.6 / 225 / 200 / ~81.8<br>1.0 / - / 157 / 1000 / ~98        | 1M NaClO <sub>4</sub> in (v/v) EC<br>:PC:DMC(1:1:1)+5%FEC | 17               |
| SGHC-1000 | 0.01-2.5  | 0.05 / 68.1 / 330.8 / 100 / ~93.2<br>1 / - / 136.1 / 1000 / 86      | 1M NaClO <sub>4</sub> in 1:1 (v/v) EC: DEC                | 18               |
| 3D-CGCG1  | 0.01-3.0  | 0.05 / 37.1 / 415.5 / - / -<br>2 / - / 101 / 2000 / ~58             | 1M NaClO <sub>4</sub> in 1:1 (v/v) EC: PC +5% FEC         | 19               |
| CPOP-1400 | 0.01-3.0  | 0.03 / 88.6 / 279.3 / 200 / 93.1                                    | 1M NaClO <sub>4</sub> in 1:1 (v/v) EC: DMC                | 20               |
| AG-50     | 0.01-3.0  | 0.1 / 42.35 / 221.3 / 200 / 96.9<br>1 / 36.08 / 139.1 / 4500 / 80.7 | 1M NaClO <sub>4</sub> in 1:1 (v/v) EC: DEC + 5% FEC       | <b>This work</b> |

---

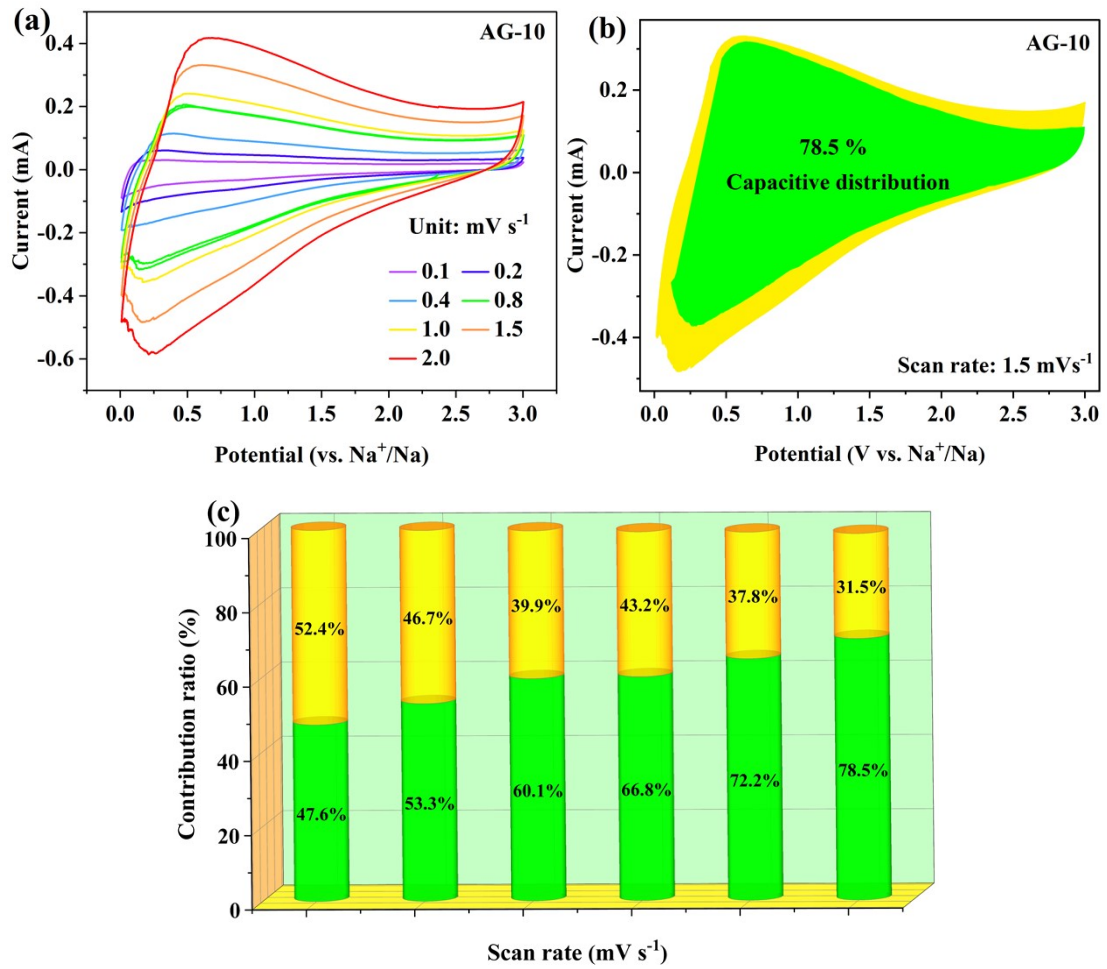

**Figure S3.** (a) CV curves at various scan rates, (b) CV profile of AG-10 at the scan rate of 1.5 mV s<sup>-1</sup>. Shaded region shows the calculated capacitive contribution. (c) Contribution percentages of diffusion-controlled and capacitive processes at different scan rates.



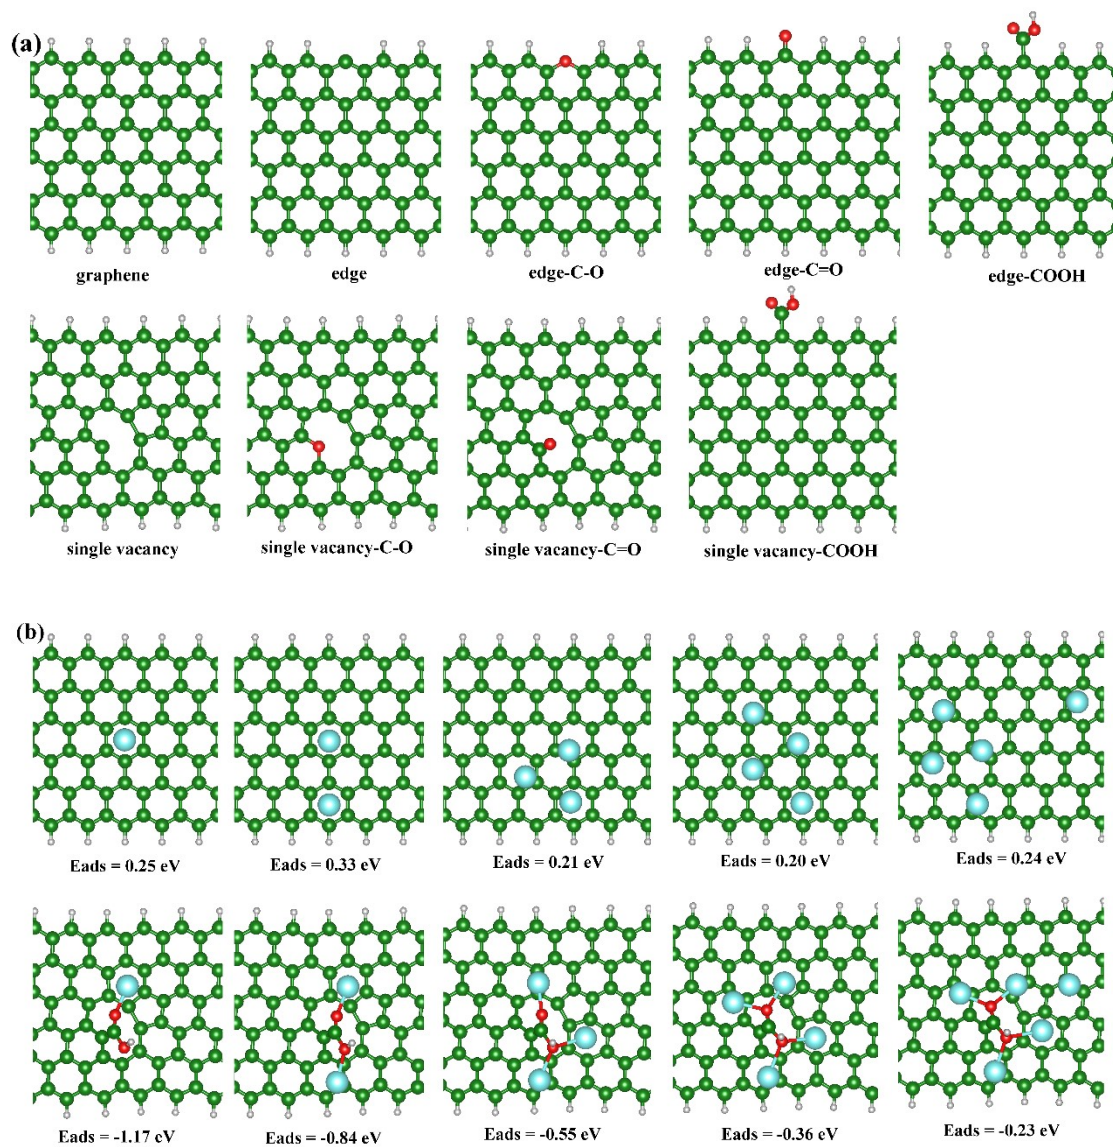

**Figure S4.** (a) various models. (b) 1-5 Na atom adsorption energies over adsorption energies of one Na atom over the pristine graphene and the vacancy with COOH, respectively.

## References

1. S. Komaba, W. Murata, T. Ishikawa, N. Yabuuchi, T. Ozeki, T. Nakayama, A. Ogata, K. Gotoh and K. Fujiwara, *Adv. Funct. Mater.*, 2011, **21**, 3859-3867.
2. Z. Wang, L. Qie, L. Yuan, W. Zhang, X. Hu and Y. Huang, *Carbon*, 2013, **55**, 328-334.
3. H. G. Wang, Z. Wu, F. L. Meng, D. L. Ma, X. L. Huang, L. M. Wang and X. B. Zhang, *ChemSusChem*, 2013, **6**, 56-60.
4. S. J. R. Prabakar, J. Jeong and M. Pyo, *Electrochim. Acta*, 2015, **161**, 23-31.
5. P. Lu, Y. Sun, H. Xiang, X. Liang and Y. Yu, *Adv. Energy Mater.*, 2018, **8**, 1702434.
6. H. Hou, L. Shao, Y. Zhang, G. Zou, J. Chen and X. Ji, *Adv. Sci.*, 2017, **4**, 1600243.
7. L. Cao, W. Hui, Z. Xu, J. Huang, P. Zheng, J. Li and Q. Sun, *J. Alloy. Compd.*, 2017, **695**, 632-637.
8. F. Sun, H. Wang, Z. Qu, K. Wang, L. Wang, J. Gao, J. Gao, S. Liu and Y. Lu, *Adv. Energy Mater.*, 2020, **11**, 2002981.
9. J. Yang, X. Zhou, D. Wu, X. Zhao and Z. Zhou, *Adv Mater*, 2017, **29**, 1604108.
10. J. Ye, J. Zang, Z. Tian, M. Zheng and Q. Dong, *J. Mater. Chem. A*, 2016, **4**, 13223-13227.
11. E. M. Lotfabad, J. Ding, K. Cui, A. Kohandehghan, W. P. Kalisvaart, M. Hazelton, and D. Mitlin, *Acs Nano*, 2014, **8**, 7115-7129.
12. R. R. Gaddam, D. Yang, R. Narayan, K. Raju, N. A. Kumar and X. S. Zhao, *Nano Energy*, 2016, **26**, 346-352.
13. W. Xiong, Z. Wang, J. Zhang, C. Shang, M. Yang, L. He and Z. Lu, *Energy Storage Mater.*, 2017, **7**, 229-235.
14. F. Wu, M. Zhang, Y. Bai, X. Wang, R. Dong and C. Wu, *ACS Appl Mater Interfaces*, 2019, **11**, 12554-12561.
15. D. Yoon, J. Hwang, W. Chang and J. Kim, *ACS Appl. Mater. Interfaces*, 2018, **10**, 569-581.
16. Y. Zhang, X. Li, P. Dong, G. Wu, J. Xiao, X. Zeng, Y. Zhang and X. Sun, *ACS Appl. Mater. Interfaces*, 2018, **10**, 42796-42803.
17. W. Hong, Y. Zhang, L. Yang, Y. Tian, P. Ge, J. Hu, W. Wei, G. Zou, H. Hou and X. Ji, *Nano Energy*, 2019, **65**, 104038.
18. K. Wang, Y. Xu, Y. Li, V. Dravid, J. Wu and Y. Huang, *J. Mater. Chem. A*, 2019, **7**, 3327-3335.
19. M. Kang, H. Zhao, J. Ye, W. Song, H. Shen, J. Mi and Z. Li, *J. Mater. Chem. A*, 2019, **7**, 7565-7572.
20. Y. Lu, C. Zhao, X. Qi, Y. Qi, H. Li, X. Huang, L. Chen and Y.-S. Hu, *Adv. Energy Mater.*, 2018, **8**, 1800108.
